# Supplementary material for: Enzyme-instructed self-assembly of hydrogelators consisting of nucleobases, amino acids, and saccharide
Source: Royal Society of Chemistry journal article supplement (doi:10.1039/c4ra04765f), 2014-01-01
Supplement: c4ra04765f1.pdf [file c4ra04765f1.pdf]

Supporting Information

## Enzyme-instructed self-assembly of the hydrogelators consisting of nucleobase, amino acids, and saccharide

Dan Yuan<sup>a</sup>, Rong Zhou<sup>a</sup>, Junfeng Shi<sup>a</sup>, Xuewen Du<sup>a</sup>, Xinming Li<sup>a</sup>, and Bing Xu<sup>\*,a</sup>

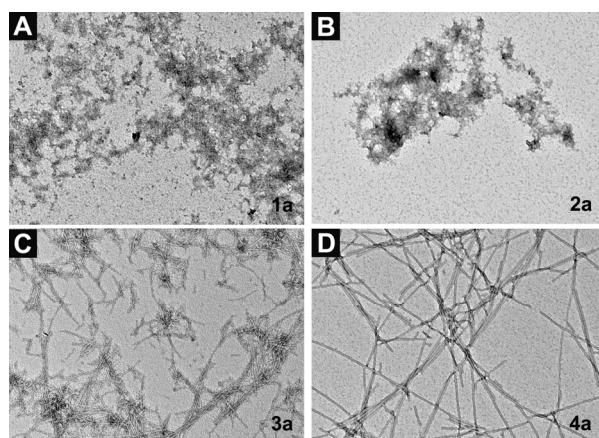

**Fig. S1.** Transmission electron micrograph (TEM) images of solution (A) **1a**, (B) **2a**, (C) **3a**, (D) **4a** shown in Fig. 1. They all dissolve in PBS buffer. **1a**, **2a**, and **4a** are at the concentration of 1.0 wt %; **3a** is at the concentration of 0.5 wt %. Scale bar = 100 nm.

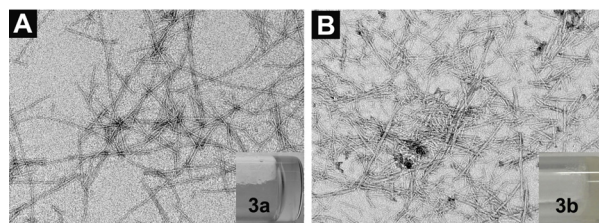

**Fig. S2.** TEM images of **3a** and **3b** at the concentration of 1 wt% in PBS buffer. Inserts are the corresponding optical images. Scale bar = 100 nm.

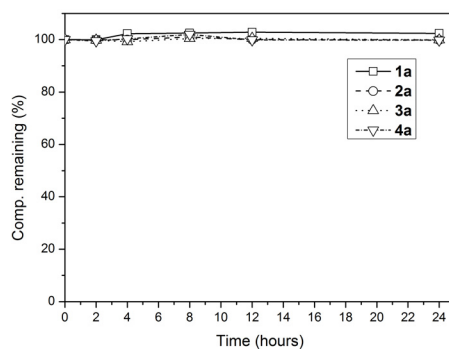

**Fig. S3.** Digestion curves of precursors **1a-4a** (0.02wt%) by proteinase K (3.2 U/mL) in 10 mM HEPES buffer.

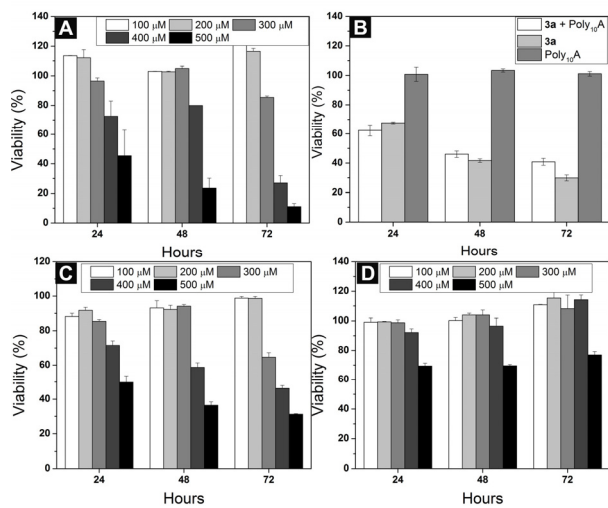

**Fig. S4.** Cell viability test of (A) **3a**, (B) **3a** at the concentration of 500  $\mu\text{M}$  with and without Poly<sub>10</sub>A (50  $\mu\text{M}$ ), (C) **3b**, (D) **4b** against HeLa cells for 72 hours.

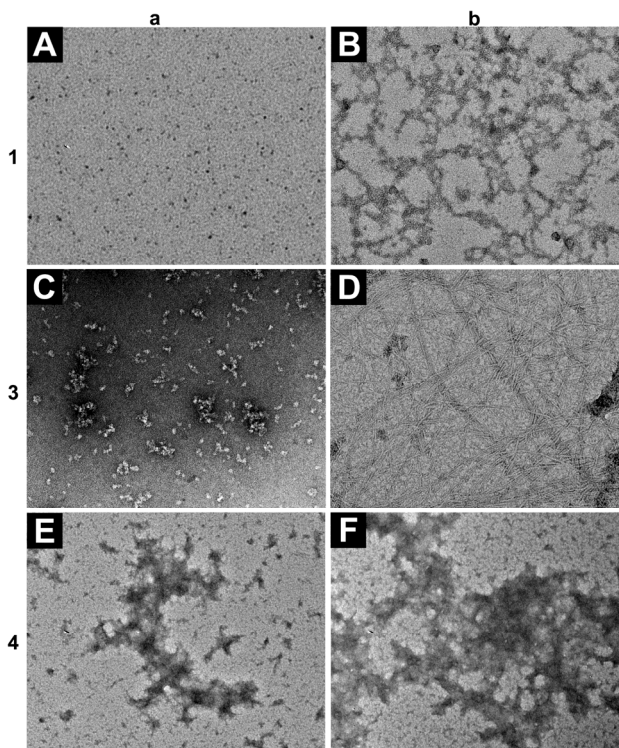

**Fig. S5.** TEM images of the solutions of precursors before and after adding ALP (1.0 U/mL) at the concentration of 500  $\mu\text{M}$  in PBS buffer (A) **1a**, (B) **1b**, (C) **3a**, (D) **3b**, (E) **4a**, (F) **4b**. Scale bar = 100 nm.
